# Supplementary material for: Association of Systemic Lupus Erythematosus with C8orf13–BLK and ITGAM–ITGAX
Source: Atypon-hosted journal article supplement (doi:10.1056/nejmoa0707865), 2008-01-20
Supplement: nejm_hom_900sa1.pdf [file nejm_hom_900sa1.pdf]

## Supplementary Appendix

This appendix has been provided by the authors to give readers additional information about their work.

Supplement to: Hom G, Graham RR, Modrek B, et al. Association of systemic lupus erythematosus with *C8orf13*-*BLK* and *ITGAM*-*ITGAX*. *N Engl J Med* 2008;358:900-9. DOI: 10.1056/NEJMoa0707865.

## SUPPLEMENTARY INFORMATION

### METHODS

#### DATA QUALITY FILTERS

Samples with an average call rate of  $\leq 95\%$  (N=42) or where the reported sex of the individual was discordant with observed sex (N=21) were excluded from the analysis. The identity by state (IBS) across the genome was estimated for each sample, and the samples examined for cryptic relatedness. One sample from each pair estimated to be duplicates or 1st-3rd degree relatives was removed ( $\hat{P}_i > 0.10$  and  $Z_1 \geq 0.15$ , N=161). Three of these pairs were comprised of both a case and a control; the control was removed. SNPs with a frequency in cases of  $< 1\%$  (N=21,644) or a HWE  $P \leq 1 \times 10^{-6}$  in controls (N=2819) were removed from the analysis. SNPs with missingness  $> 5\%$  (N=6074) were removed. SNPs were tested for the probability of a significant difference in missingness between cases and controls; SNPs with  $P \leq 1 \times 10^{-5}$  (N=7646) were removed. SNPs were also tested for batch effects: for example, between ABCoN samples and all other cases; SNPs with  $P < 1 \times 10^{-9}$  (N=13) were removed.

Population outliers were detected using EIGENSTRAT.<sup>1</sup> Samples more than 6 standard deviations from the mean along any of the top 10 principal components

were excluded from the analysis (N=141). Data from the 3340 remaining control samples were randomly assigned to each SLE case series proportionately, resulting in a ~2.5 control:case ratio.

## DATA ANALYSIS

After removing low quality data using the QC filters above to minimize technical artifacts, evidence of inflation was noted for each series: 1.14, 1.18, and 1.11, respectively, for Series 1, 2 and 3. To correct for the presence of population stratification, principal components for each series were calculated using a subset of SNPs in EIGENSTRAT.<sup>1</sup> SNPs with case MAF < 2% (5011), control HWE  $P \leq 1 \times 10^{-4}$  (1792), or missing data > 1% (50414) were removed, as were SNPs in regions of abnormal LD patterns due to structural variation on chromosomes 6 (from 24-36 Mb), 8 (8-12 Mb), 11 (42-58 Mb), and 17 (40-43 Mb). The remaining 440,202 SNPs were used to calculate principal components. In each series, the first 4 principal components were used to adjust the association statistic for all 502,033 SNPs. After adjustment for population stratification, the  $\lambda_{gc}$  for each series approached 1.0. The corrected association statistic for each series was combined by the weighted merging of the Z-score incorporating  $\lambda_{gc}$  (Supplementary Figure 1).

To test for heterogeneity between the three case-control studies for the most significantly associated variants, we ran the Breslow-Day test implemented in PLINK for the SNP with the best association in each of these regions: HLA DRB,

STAT4, IRF5, BLK, and ITGAM/ITGAX. No significant heterogeneity was detected (each  $P > 0.2$ ).

Associations between individual SNPs and subphenotypes were calculated for the combined dataset (Supplementary Table 6), using the Mantel-Haenszel heterogeneity test and combined odds ratio implemented in Stata 9.2 (<http://www.stata.com/>). In the Swedish samples, 521 cases were examined for an association to the ACR criteria. Statistical significance was assessed by 2x2 contingency tables and a chi square test (Supplementary Table 7). The calculated P-values were not adjusted for multiple testing, since the ACR criteria are known to be correlated and a simple Bonferroni correction of  $\alpha=0.05/11=0.0045$  would likely be overly conservative.

#### GENE EXPRESSION ANALYSIS

Gene expression measurements of Epstein-Barr Virus transformed B cell lines from 210 unrelated, healthy HapMap individuals from a publicly available dataset (GENEVAR project, <http://www.sanger.ac.uk/humgen/genevar/>) were examined for a correlation to variants significantly associated with SLE.<sup>2</sup> Specifically, the median fluorescence intensity of 4 measurements from probes for *BLK* (GI\_33469981-S), *C8orf13* (GI\_32698772-S), *ITGAM* (GI\_6006013-S), *ITGAX* (GI\_34452172-S), *ACTB* (beta-actin, GI\_5016088-S), and *GAPDH* (GI\_7669491-S) from 60 U.S. residents with northern and western European ancestry (CEU), 60 Yoruba (YRI), 45 Han Chinese individuals from Beijing (CHB) and 45 Japanese individuals from Tokyo (JPT) were examined. The expression data for

*BLK*, *C8orf13*, *GAPDH* and *ACTB*, in Epstein-Barr Virus transformed B cell lines from 210 unrelated, healthy HapMap individuals, were stratified by rs13277113 genotype (obtained from the HapMap (<http://www.hapmap.org>)), and the significance of the differential expression was measured by a 2-tailed t-test assuming an equal variance. Similarly, the expression data for *ITGAM*, *ITGAX*, *GAPDH* and *ACTB* were stratified by genotype at rs11574637 and tested for significance using a t-test. Expression data normalized on a log scale across the HapMap populations as described by the GENEVAR project yielded similar results to the median fluorescence intensity.

The association of *BLK* and *C8orf13* expression to cis-genetic variation in an independent set of 400 EBV-transformed B cells was obtained by the examination and data-mining of a recently published study (<http://www.sph.umich.edu/csg/liang/asthma/>).<sup>3</sup> Specifically, the association of a proxy for rs13277113 (rs4840568) to the expression levels of *BLK* (probe 206255\_at) and *C8orf13* (probe 226614\_s\_at) was measured as described by Dixon et al.<sup>3</sup>

## SUPPLEMENTARY RESULTS

### ASSOCIATIONS WITH SLE CLINICAL FEATURES

Finally, we examined the associations between the two top SNPs, rs11574637 (*BLK*) and rs13277113 (*ITGAM*), and the presence of individual ACR criteria, using the combined case series 1-3 (Supplementary Table 6, and see Supplementary Methods). The strongest association was an inverse relationship between the rs11574637 minor allele and the presence of arthritis, OR=0.73 (95% CI = 0.59-0.91, P = 0.0045). Both variants were modestly associated with hematologic criteria: rs11574637, OR=1.21 (95% CI = 1.00-1.47, P = 0.04) and rs13277113, OR = 1.23 (95% CI = 1.03-1.46, P = 0.02). However, in 521 Swedish cases, no significant associations of *BLK* and *ITGAM* variants were observed (Supplementary Table 7).

## SUPPLEMENTARY REFERENCES

1. Price AL, Patterson NJ, Plenge RM, Weinblatt ME, Shadick NA, Reich D. Principal components analysis corrects for stratification in genome-wide association studies. *Nat Genet* 2006;38(8):904-09.
2. Stranger BE, Nica AC, Forrest MS, et al. Population genomics of human gene expression. *Nat Genet* 2007;39(10):1217-24.
3. Dixon AL, Liang L, Moffatt MF, et al. A genome-wide association study of global gene expression. *Nat Genet* 2007;39(10):1202-07.

## SUPPLEMENTARY TABLES

Supplementary Table 1: Frequency of clinical characteristics in SLE Series 1-3 and Swedish cases.

| <b>Phenotypes*</b>   | <b>All GWAS Subjects</b> | <b>Series 1</b> | <b>Series 2</b> | <b>Series 3</b> | <b>Swedish Cases</b> |
|----------------------|--------------------------|-----------------|-----------------|-----------------|----------------------|
| Anti-nuclear autoAbs | 1193/1301 (91.7%)        | 385/409 (94.1%) | 541/595 (90.9%) | 292/297 (98.3%) | 758/781 (97.1%)      |
| Arthritis            | 1023/1303 (78.5%)        | 310/411 (75.4%) | 444/595 (74.6%) | 269/297 (90.6%) | 594/781 (76.1%)      |
| Photosensitivity     | 928/1301 (71.3%)         | 288/411 (70.1%) | 469/595(78.8%)  | 171/295 (58.0%) | 528/781 (67.61%)     |
| Immunologic disorder | 867/1303 (66.5%)         | 313/411 (76.2%) | 336/595 (56.5%) | 218/297 (73.4%) | 511/781 (65.4%)      |
| Hematologic disorder | 795/1301 (61.1%)         | 274/411 (66.7%) | 368/595 (61.9%) | 153/295 (51.9%) | 450/781 (57.6%)      |
| Malar rash           | 635/1270 (50.0%)         | 235/411 (57.2%) | 274/595 (46.1%) | 126/264 (47.7%) | 452/781 (57.9%)      |
| Oral ulcers          | 564/1302 (43.3%)         | 222/411 (54.0%) | 183/595 (30.8%) | 159/296 (53.7%) | 180/781 (23.0%)      |
| Serositis            | 499/1299 (38.4%)         | 195/410 (47.6%) | 175/595 (29.4%) | 129/294 (43.9%) | 345/781 (44.2%)      |
| Renal disorder       | 365/1302 (28.0%)         | 137/411 (33.3%) | 139/595 (23.4%) | 89/296 (30.1%)  | 239/781 (30.6%)      |
| Neurologic disorder  | 125/1301 (9.6%)          | 38/411 (9.3%)   | 59/595 (9.9%)   | 28/295 (9.5%)   | 88/781 (11.3%)       |
| Discoid rash         | 120/1270 (9.5%)          | 67/411 (16.3%)  | 39/595 (6.6%)   | 14/264 (5.3%)   | 196/781 (25.1%)      |
|                      |                          |                 |                 |                 |                      |
|                      |                          |                 |                 |                 |                      |

\*See <http://www.rheumatology.org/publications/classification/SLE/sle.asp> for phenotype definitions.

Supplementary Table 2. Top 50 loci associated with SLE in a whole genome scan in 1311 cases and 3340 controls.

| CHR | Band     | SNP *      | Position (build 35) | Locus       | Series 1:<br>411 cases, 1047 controls |      |         |            | Series 2:<br>595 cases, 1516 controls |      |         |          | Series 3:<br>305 cases, 777 controls |      |         |          | Combined:<br>1311 cases, 3340 controls |      |         |          |
|-----|----------|------------|---------------------|-------------|---------------------------------------|------|---------|------------|---------------------------------------|------|---------|----------|--------------------------------------|------|---------|----------|----------------------------------------|------|---------|----------|
|     |          |            |                     |             | Allele                                | Case | Control | $\chi^2$ ^ | Allele                                | Case | Control | $\chi^2$ | Allele                               | Case | Control | $\chi^2$ | Allele                                 | Case | Control | P *      |
|     |          |            |                     |             |                                       |      |         |            |                                       |      |         |          |                                      |      |         |          |                                        |      |         |          |
| 6   | 6p21.32  | rs2187668  | 32,713,863          | HLA-DQA1    | A                                     | 0.18 | 0.11    | 27.1       | A                                     | 0.19 | 0.12    | 29.0     | A                                    | 0.21 | 0.11    | 34.6     | A                                      | 0.19 | 0.11    | 2.71E-21 |
| 2   | 2q32.2   | rs7574865  | 191,790,140         | STAT4       | T                                     | 0.31 | 0.22    | 27.2       | T                                     | 0.30 | 0.24    | 14.3     | T                                    | 0.33 | 0.24    | 16.1     | T                                      | 0.31 | 0.23    | 8.96E-14 |
| 7   | 7q32.1   | rs10488631 | 128,188,135         | IRF5/TNPO3  | C                                     | 0.17 | 0.12    | 12.1       | C                                     | 0.17 | 0.11    | 23.9     | C                                    | 0.17 | 0.11    | 13.0     | C                                      | 0.17 | 0.11    | 1.65E-11 |
| 8   | 8p23.1   | rs13277113 | 11,386,596          | BLK/C8orf13 | A                                     | 0.29 | 0.24    | 5.3        | A                                     | 0.28 | 0.22    | 12.8     | A                                    | 0.31 | 0.22    | 12.5     | A                                      | 0.29 | 0.23    | 7.57E-08 |
| 16  | 16p11.2  | rs11574637 | 31,276,376          | ITGAM/ITGAX | C                                     | 0.20 | 0.18    | 1.7        | C                                     | 0.24 | 0.19    | 18.4     | C                                    | 0.25 | 0.20    | 10.9     | C                                      | 0.23 | 0.19    | 5.35E-07 |
| 9   | 9q34.13  | rs11243676 | 132,126,322         | NTNG2       | A                                     | 0.05 | 0.07    | 6.7        | A                                     | 0.05 | 0.06    | 2.7      | A                                    | 0.04 | 0.07    | 13.3     | A                                      | 0.05 | 0.07    | 2.65E-06 |
| 5   | 5p12     | rs979233   | 42,411,001          | GHR         | T                                     | 0.50 | 0.46    | 12.2       | T                                     | 0.47 | 0.46    | 3.5      | T                                    | 0.49 | 0.44    | 6.6      | T                                      | 0.48 | 0.45    | 3.85E-06 |
| 18  | 18q22.3  | rs17083844 | 66,993,224          | SOCS6       | A                                     | 0.04 | 0.03    | 4.0        | A                                     | 0.04 | 0.03    | 2.8      | A                                    | 0.06 | 0.03    | 14.5     | A                                      | 0.05 | 0.03    | 6.05E-06 |
| 1   | 1p31.1   | rs12141391 | 71,986,495          | NEGR1       | A                                     | 0.04 | 0.02    | 5.7        | A                                     | 0.04 | 0.02    | 7.4      | A                                    | 0.04 | 0.02    | 7.5      | A                                      | 0.04 | 0.02    | 6.99E-06 |
| 17  | 17q11.2  | rs1019412  | 28,512,867          | ACCN1       | T                                     | 0.26 | 0.23    | 2.5        | T                                     | 0.26 | 0.22    | 3.4      | T                                    | 0.31 | 0.23    | 15.1     | T                                      | 0.27 | 0.23    | 1.12E-05 |
| 7   | 7p14.3   | rs729804   | 31,712,622          | PDE1C       | T                                     | 0.51 | 0.47    | 3.7        | T                                     | 0.49 | 0.47    | 4.7      | T                                    | 0.55 | 0.47    | 11.3     | T                                      | 0.51 | 0.47    | 1.27E-05 |
| 2   | 2q36.3   | rs4675077  | 227,063,536         | IRS1        | C                                     | 0.17 | 0.14    | 0.6        | C                                     | 0.18 | 0.15    | 8.0      | C                                    | 0.19 | 0.13    | 14.9     | C                                      | 0.18 | 0.14    | 1.37E-05 |
| 4   | 4q21.23  | rs1921880  | 85,314,378          | MGC11324    | A                                     | 0.08 | 0.14    | 9.0        | A                                     | 0.11 | 0.13    | 1.3      | A                                    | 0.09 | 0.13    | 9.7      | A                                      | 0.09 | 0.13    | 1.49E-05 |
| 12  | 12q14.2  | rs7956933  | 61,631,286          | AVPR1A      | G                                     | 0.01 | 0.02    | 5.2        | G                                     | 0.01 | 0.02    | 7.1      | G                                    | 0.01 | 0.02    | 6.8      | G                                      | 0.01 | 0.02    | 1.59E-05 |
| 20  | 20q13.12 | rs6094661  | 45,387,700          | PRKCBP1     | T                                     | 0.13 | 0.10    | 6.9        | T                                     | 0.10 | 0.08    | 3.9      | T                                    | 0.12 | 0.08    | 7.6      | T                                      | 0.12 | 0.09    | 1.83E-05 |
| 17  | 17p11.2  | rs4404112  | 16,789,646          | TNFRSF13B   | G                                     | 0.18 | 0.17    | 1.9        | G                                     | 0.20 | 0.18    | 3.9      | G                                    | 0.23 | 0.15    | 14.8     | G                                      | 0.20 | 0.17    | 1.86E-05 |
| 2   | 2q31.1   | rs1386354  | 172,837,045         | DLX2        | A                                     | 0.12 | 0.17    | 15.5       | A                                     | 0.15 | 0.16    | 2.1      | A                                    | 0.12 | 0.16    | 3.8      | A                                      | 0.13 | 0.16    | 1.97E-05 |
| 5   | 5q33.3   | rs254850   | 158,599,310         | UBLCP1      | T                                     | 0.21 | 0.17    | 6.9        | T                                     | 0.24 | 0.18    | 18.9     | T                                    | 0.21 | 0.19    | 0.9      | T                                      | 0.22 | 0.18    | 2.67E-05 |
| 10  | 10p14    | rs11255111 | 7,479,732           | SFMBT2      | A                                     | 0.02 | 0.04    | 3.0        | A                                     | 0.02 | 0.03    | 6.8      | A                                    | 0.01 | 0.04    | 8.9      | A                                      | 0.02 | 0.03    | 2.71E-05 |
| 5   | 5p13.1   | rs982054   | 42,163,692          | FBXO4       | C                                     | 0.29 | 0.29    | 2.2        | C                                     | 0.30 | 0.30    | 6.2      | C                                    | 0.34 | 0.28    | 10.4     | C                                      | 0.31 | 0.29    | 2.80E-05 |
| 12  | 12q24.23 | rs1961707  | 117,843,445         | KIAA1853    | T                                     | 0.29 | 0.34    | 6.3        | T                                     | 0.29 | 0.34    | 13.1     | T                                    | 0.31 | 0.34    | 2.3      | T                                      | 0.29 | 0.34    | 2.90E-05 |
| 8   | 8p23.1   | rs656319   | 9,851,822           | MSRA        | T                                     | 0.45 | 0.44    | 0.7        | T                                     | 0.47 | 0.43    | 7.9      | T                                    | 0.49 | 0.40    | 12.5     | T                                      | 0.47 | 0.42    | 3.10E-05 |
| 8   | 8q12.3   | rs11783343 | 62,835,576          | ASPH        | T                                     | 0.11 | 0.17    | 16.0       | T                                     | 0.17 | 0.17    | 0.0      | T                                    | 0.14 | 0.19    | 7.5      | T                                      | 0.14 | 0.17    | 3.37E-05 |
| 1   | 1q21.1   | rs885239   | 144,352,419         | ACP6        | A                                     | 0.19 | 0.16    | 6.1        | A                                     | 0.17 | 0.16    | 2.9      | A                                    | 0.18 | 0.15    | 8.2      | A                                      | 0.18 | 0.16    | 3.46E-05 |
| 2   | 2p14     | rs874952   | 65,520,177          | SPRED2      | A                                     | 0.13 | 0.15    | 7.2        | A                                     | 0.12 | 0.14    | 6.4      | A                                    | 0.12 | 0.15    | 4.4      | A                                      | 0.12 | 0.14    | 3.48E-05 |
| 8   | 8p23.1   | rs2955587  | 8,135,490           | DEFB4       | G                                     | 0.47 | 0.44    | 0.9        | G                                     | 0.46 | 0.41    | 5.0      | G                                    | 0.50 | 0.40    | 14.4     | G                                      | 0.47 | 0.42    | 3.53E-05 |
| 8   | 8p12     | rs4732990  | 29,592,131          | DUSP4       | T                                     | 0.17 | 0.14    | 6.9        | T                                     | 0.17 | 0.15    | 3.7      | T                                    | 0.18 | 0.13    | 6.6      | T                                      | 0.17 | 0.14    | 3.56E-05 |
| 3   | 3p26.3   | rs17039471 | 1,469,265           | CNTN6       | A                                     | 0.07 | 0.06    | 1.4        | A                                     | 0.07 | 0.07    | 1.8      | A                                    | 0.11 | 0.06    | 17.2     | A                                      | 0.08 | 0.06    | 3.74E-05 |
| 1   | 1q25.3   | rs171980   | 179,158,255         | RGS12       | T                                     | 0.17 | 0.23    | 9.7        | T                                     | 0.18 | 0.21    | 5.4      | T                                    | 0.18 | 0.21    | 3.3      | T                                      | 0.18 | 0.21    | 3.75E-05 |
| 14  | 14q21.1  | rs7160383  | 40,448,684          | LRFN5       | A                                     | 0.35 | 0.39    | 6.7        | A                                     | 0.35 | 0.39    | 4.8      | A                                    | 0.35 | 0.41    | 5.7      | A                                      | 0.35 | 0.40    | 3.90E-05 |
| 9   | 9q21.33  | rs13297855 | 84,194,130          | SLC28A3     | T                                     | 0.16 | 0.12    | 6.1        | T                                     | 0.13 | 0.13    | 0.0      | T                                    | 0.18 | 0.11    | 15.5     | T                                      | 0.15 | 0.12    | 3.94E-05 |
| 18  | 18p11.21 | rs11665283 | 14,538,205          | ANKRD30B    | G                                     | 0.22 | 0.20    | 2.4        | G                                     | 0.23 | 0.19    | 4.5      | G                                    | 0.23 | 0.18    | 11.0     | G                                      | 0.23 | 0.19    | 4.03E-05 |
| 17  | 17q21.31 | rs183211   | 42,143,494          | NSF         | A                                     | 0.23 | 0.26    | 2.9        | A                                     | 0.20 | 0.25    | 6.3      | A                                    | 0.20 | 0.25    | 8.5      | A                                      | 0.21 | 0.25    | 4.04E-05 |
| 12  | 12p13.2  | rs7980903  | 12,182,906          | BCL2L14     | C                                     | 0.21 | 0.18    | 5.0        | C                                     | 0.19 | 0.18    | 0.4      | C                                    | 0.24 | 0.16    | 14.4     | C                                      | 0.21 | 0.18    | 4.10E-05 |
| 14  | 14q12    | rs2180818  | 25,199,668          | STXBP6      | A                                     | 0.41 | 0.47    | 8.6        | A                                     | 0.41 | 0.45    | 5.4      | A                                    | 0.40 | 0.47    | 3.8      | A                                      | 0.41 | 0.46    | 4.34E-05 |
| 7   | 7p15.3   | rs1029597  | 21,536,386          | DNAH11      | A                                     | 0.16 | 0.19    | 3.1        | A                                     | 0.15 | 0.17    | 3.4      | A                                    | 0.13 | 0.19    | 11.0     | A                                      | 0.15 | 0.18    | 4.42E-05 |
| 17  | 17q22    | rs7503456  | 50,635,553          | STXBP4      | C                                     | 0.17 | 0.16    | 0.4        | C                                     | 0.19 | 0.16    | 8.2      | C                                    | 0.19 | 0.13    | 12.9     | C                                      | 0.18 | 0.16    | 4.43E-05 |
| 8   | 8p23.1   | rs12678938 | 10,054,380          | MSRA        | T                                     | 0.42 | 0.42    | 0.0        | T                                     | 0.41 | 0.44    | 3.7      | T                                    | 0.36 | 0.47    | 22.5     | T                                      | 0.40 | 0.44    | 4.45E-05 |
| 12  | 12q23.3  | rs7958842  | 107,166,267         | KIAA0789    | A                                     | 0.10 | 0.08    | 2.5        | A                                     | 0.12 | 0.09    | 12.7     | A                                    | 0.12 | 0.09    | 4.7      | A                                      | 0.11 | 0.09    | 4.80E-05 |
| 4   | 4q27     | rs17449954 | 122,965,334         | ANKA5       | C                                     | 0.06 | 0.05    | 1.1        | C                                     | 0.06 | 0.04    | 4.1      | C                                    | 0.09 | 0.04    | 13.9     | C                                      | 0.07 | 0.05    | 4.86E-05 |
| 3   | 3p22.1   | rs10510732 | 41,982,344          | OIP106      | A                                     | 0.13 | 0.17    | 3.3        | A                                     | 0.13 | 0.16    | 6.1      | A                                    | 0.12 | 0.17    | 7.7      | A                                      | 0.13 | 0.17    | 5.04E-05 |
| 17  | 17q25.2  | rs12451573 | 72,778,745          | SEPT9       | T                                     | 0.09 | 0.09    | 0.2        | T                                     | 0.10 | 0.08    | 5.9      | T                                    | 0.13 | 0.08    | 15.9     | T                                      | 0.11 | 0.08    | 5.06E-05 |
| 8   | 8p23.1   | rs7814795  | 10,556,696          | RP1L1       | C                                     | 0.47 | 0.44    | 2.4        | C                                     | 0.47 | 0.43    | 3.9      | C                                    | 0.51 | 0.42    | 11.0     | C                                      | 0.48 | 0.43    | 5.24E-05 |
| 12  | 12q12    | rs10506202 | 40,307,616          | PDZRN4      | G                                     | 0.29 | 0.28    | 1.8        | G                                     | 0.31 | 0.28    | 7.5      | G                                    | 0.34 | 0.27    | 8.6      | G                                      | 0.31 | 0.28    | 5.58E-05 |
| 1   | 1q25.3   | rs12737637 | 180,458,062         | RGL1        | G                                     | 0.51 | 0.48    | 1.9        | G                                     | 0.51 | 0.48    | 3.9      | G                                    | 0.53 | 0.46    | 11.8     | G                                      | 0.52 | 0.47    | 5.63E-05 |
| 15  | 15q15.1  | rs8023530  | 39,435,068          | NUSAP1      | C                                     | 0.29 | 0.25    | 4.1        | C                                     | 0.28 | 0.27    | 6.0      | C                                    | 0.29 | 0.24    | 6.5      | C                                      | 0.29 | 0.26    | 5.69E-05 |
| 11  | 11q22.1  | rs1021273  | 98,316,370          | CNTN5       | G                                     | 0.29 | 0.34    | 11.5       | G                                     | 0.32 | 0.32    | 0.2      | G                                    | 0.28 | 0.34    | 11.7     | G                                      | 0.30 | 0.33    | 5.88E-05 |
| 6   | 6q22.31  | rs6917641  | 121,305,805         | C6orf170    | G                                     | 0.09 | 0.11    | 2.1        | G                                     | 0.08 | 0.10    | 4.6      | G                                    | 0.07 | 0.13    | 10.3     | G                                      | 0.08 | 0.11    | 6.05E-05 |
| 1   | 1p34.1   | rs226081   | 44,515,586          | C1orf164    | G                                     | 0.37 | 0.31    | 5.4        | G                                     | 0.36 | 0.32    | 13.2     | G                                    | 0.34 | 0.31    | 1.9      | G                                      | 0.36 | 0.31    | 6.26E-05 |
| 8   | 8q24.23  | rs16906782 | 138,202,322         | LOC51059    | G                                     | 0.10 | 0.07    | 8.1        | G                                     | 0.08 | 0.08    | 0.1      | G                                    | 0.11 | 0.07    | 11.2     | G                                      | 0.09 | 0.07    | 6.62E-05 |
| 2   | 2q24.2   | rs13023380 | 162,979,871         | IFIH1       | G                                     | 0.45 | 0.50    | 2.6        | G                                     | 0.44 | 0.49    | 5.1      | G                                    | 0.44 | 0.52    | 9.0      | G                                      | 0.45 | 0.50    | 6.85E-05 |

\* The most associated SNP from the top 50 loci. SNPs within 100kb of the most associated SNP in a region were excluded and only the top HLA region SNP is included. For full results and additional detail, see summary statistics for all SNPs (Supplementary Table 5).

^ The EIGENSTRAT corrected chi square value for each series.

\* The combined P value as described in the methods.

Supplementary Table 3. Expression levels of *BLK*, *C8orf13* and control genes in 210 transformed B cell lines from HapMap individuals.

|                                                                                                                                                                                                                                                                                                                                                                                                                                                                                                                                                                                                                                              | Genotype <sup>^</sup> | N  | Median Fluorescence Intensity * |                |             |              |       | P*          |                |             |              |
|----------------------------------------------------------------------------------------------------------------------------------------------------------------------------------------------------------------------------------------------------------------------------------------------------------------------------------------------------------------------------------------------------------------------------------------------------------------------------------------------------------------------------------------------------------------------------------------------------------------------------------------------|-----------------------|----|---------------------------------|----------------|-------------|--------------|-------|-------------|----------------|-------------|--------------|
|                                                                                                                                                                                                                                                                                                                                                                                                                                                                                                                                                                                                                                              |                       |    | <i>BLK</i>                      | <i>C8orf13</i> | <i>ACTB</i> | <i>GAPDH</i> |       | <i>BLK</i>  | <i>C8orf13</i> | <i>ACTB</i> | <i>GAPDH</i> |
| rs13277113                                                                                                                                                                                                                                                                                                                                                                                                                                                                                                                                                                                                                                   | AA                    | 37 | 1038.8                          | 400.5          | 50972.2     | 27367.8      | AAvAG | 0.00011     | 6.1461E-05     | 0.691       | 0.746        |
| rs13277113                                                                                                                                                                                                                                                                                                                                                                                                                                                                                                                                                                                                                                   | AG                    | 74 | 1574.0                          | 275.7          | 51272.0     | 27656.2      | AGvGG | 0.00163     | 1.01146E-07    | 0.259       | 0.835        |
| rs13277113                                                                                                                                                                                                                                                                                                                                                                                                                                                                                                                                                                                                                                   | GG                    | 87 | 2057.3                          | 165.0          | 51823.1     | 27266.8      | AAvGG | 6.46678E-11 | 2.33428E-15    | 0.161       | 0.894        |
| <p>* Median fluorescence intensity of four measurements for probes for <i>BLK</i> (GI_33469981-S), <i>C8orf13</i> (GI_32698772-S), <i>ITGAM</i> (GI_6006013-S), <i>ITGAX</i> (GI_34452172-S), <i>ACTB</i> (beta-actin, GI_5016088-S), and <i>GAPDH</i> (GI_7669491-S). All expression data is from the GENEVAR project (<a href="http://www.sanger.ac.uk/humgen/genevar/">http://www.sanger.ac.uk/humgen/genevar/</a>) .</p> <p><sup>^</sup> Significance of differential expression as determined by a T-test.</p> <p><sup>^</sup> Genotypes from the International HapMap project (<a href="http://www.hapmap.org">www.hapmap.org</a>)</p> |                       |    |                                 |                |             |              |       |             |                |             |              |

Supplementary Table 4. Expression of BLK in transformed B cells from the HapMap populations.

|            | Genotype <sup>^</sup> | CEU |                 | CHB+JPT |                | YRI |                | All Populations |                | Genotype | CEU    | CHB+JPT | YRI    | ALL                   |
|------------|-----------------------|-----|-----------------|---------|----------------|-----|----------------|-----------------|----------------|----------|--------|---------|--------|-----------------------|
|            |                       | N   | BLK expression* | N       | BLK expression | N   | BLK expression | N               | BLK expression |          | P*     | P       | P      | P                     |
| rs13277113 | AA                    | 2   | 10.17           | 33      | 9.84           | 2   | 10.56          | 37              | 9.89           | AA vs AG | 0.3673 | 0.0021  | 0.6719 | 1.9x10 <sup>-5</sup>  |
| rs13277113 | AG                    | 26  | 10.52           | 41      | 10.41          | 7   | 10.64          | 74              | 10.47          | AGvsGG   | 0.0317 | 0.2319  | 0.7338 | 4.5x10 <sup>-5</sup>  |
| rs13277113 | GG                    | 31  | 11.06           | 9       | 10.63          | 47  | 10.77          | 87              | 10.86          | AAvsGG   | 0.0476 | 0.0015  | 0.4211 | 1.1x10 <sup>-12</sup> |

\* Normalized expression values for probes for *BLK* (GI\_33469981-S). All expression data is from the GENEVAR project (<http://www.sanger.ac.uk/humgen/genevar/>) .

\* Significance of differential expression as determined by a T-test.

<sup>^</sup> Genotypes from the International HapMap project ([www.hapmap.org](http://www.hapmap.org))

Supplementary Table 5. Association of C8orf13/BLK and ITGAM/ITGAX region variants with SLE by series.

| Locus       | Chr | SNP        | Position   | Series 1:<br>411 cases, 1047 controls |         |      | Series 2:<br>595 cases, 1516 controls |         |      | Series 3:<br>305 cases, 777 controls |         |      | Combined:<br>1311 cases, 3340 controls |          |                       |
|-------------|-----|------------|------------|---------------------------------------|---------|------|---------------------------------------|---------|------|--------------------------------------|---------|------|----------------------------------------|----------|-----------------------|
|             |     |            |            | Minor Allele Frequency                |         | OR*  | Minor Allele Frequency                |         | OR   | Minor Allele Frequency               |         | OR   | OR (95% c.i.)                          | $\chi^2$ | P <sup>^</sup>        |
|             |     |            |            | Case                                  | Control |      | Case                                  | Control |      | Case                                 | Control |      |                                        |          |                       |
| C8orf13/BLK | 8   | rs2736340  | 11,381,383 | 0.289                                 | 0.242   | 1.27 | 0.283                                 | 0.226   | 1.35 | 0.313                                | 0.228   | 1.54 | 1.37 (1.24-1.51)                       | 25.7     | 4.09x10 <sup>-7</sup> |
| C8orf13/BLK | 8   | rs13277113 | 11,386,596 | 0.292                                 | 0.240   | 1.30 | 0.284                                 | 0.224   | 1.37 | 0.310                                | 0.224   | 1.55 | 1.39 (1.26-1.54)                       | 28.9     | 7.57x10 <sup>-8</sup> |
| ITGAM/ITGAX | 16  | rs9937837  | 31,206,441 | 0.187                                 | 0.127   | 1.59 | 0.179                                 | 0.135   | 1.39 | 0.175                                | 0.128   | 1.44 | 1.28 (1.16-1.41)                       | 24.7     | 6.65x10 <sup>-7</sup> |
| ITGAM/ITGAX | 16  | rs11574637 | 31,276,376 | 0.202                                 | 0.182   | 1.14 | 0.244                                 | 0.190   | 1.38 | 0.253                                | 0.198   | 1.37 | 1.30 (1.17-1.45)                       | 25.1     | 5.35x10 <sup>-7</sup> |

\* Odds ratio

<sup>^</sup> Meta P value calculated by the addition of the weighted Eigenstrat corrected Z scores adjusted for residual genomic control inflation factor from each series.

Supplementary Table 6. Association of C8orf13/BLK and ITGAM/ITGAX variants with the 11 ACR clinical criteria for SLE

|                      | <b>C8orf13/BLK: rs13277113</b> |                                          |                                                | <b>ITGAM/ITGAX: rs11574637</b> |                              |                                    |
|----------------------|--------------------------------|------------------------------------------|------------------------------------------------|--------------------------------|------------------------------|------------------------------------|
| <b>Phenotypes</b>    | <b>P*</b>                      | <b>Odds Ratio<sup>^</sup> (95% c.i.)</b> | <b>P case series heterogeneity<sup>+</sup></b> | <b>P</b>                       | <b>Odds Ratio (95% c.i.)</b> | <b>P case series heterogeneity</b> |
| Immunologic disorder | 0.84                           | -                                        | -                                              | 0.12                           | -                            | -                                  |
| Anti-nuclear autoAbs | 0.43                           | -                                        | -                                              | 0.21                           | -                            | -                                  |
| Renal disorder       | 0.56                           | -                                        | -                                              | 0.074                          | 1.20 (0.98 - 1.47)           | 0.30                               |
| Arthritis            | 0.066                          | 1.22 (0.99 - 1.51)                       | 0.54                                           | <b>0.0045</b>                  | <b>0.73 (0.59 - 0.91)</b>    | 0.42                               |
| Hematologic disorder | <b>0.024</b>                   | <b>1.23 (1.03 - 1.46)</b>                | 0.16                                           | <b>0.044</b>                   | <b>1.21 (1.00 - 1.47)</b>    | 0.22                               |
| Malar rash           | 0.46                           | -                                        | -                                              | 0.40                           | -                            | -                                  |
| Serositis            | 0.068                          | 1.18 (0.99 - 1.40)                       | 0.48                                           | 0.63                           | -                            | -                                  |
| Photosensitivity     | 0.073                          | 1.19 (0.98 - 1.45)                       | 0.84                                           | 0.46                           | -                            | -                                  |
| Neurologic disorder  | 0.70                           | -                                        | -                                              | 0.65                           | -                            | -                                  |
| Discoid rash         | 0.097                          | 1.27 (0.96 - 1.70)                       | 0.44                                           | 0.63                           | -                            | -                                  |
| Oral ulcers          | 0.17                           | -                                        | -                                              | 0.10                           | -                            | -                                  |

\* P value for association of the indicated SNP to the 11 ACR clinical criteria in the GWAS sample  
<sup>^</sup> Odds ratio and 95% confidence interval for each phenotype. Only odds ratios and heterogeneity p-values where the association P < 0.1 are displayed.  
<sup>+</sup> P value for the Mantel-Haenszel heterogeneity test

Supplementary Table 7. Association of C8orf13/BLK and ITGAM/ITGAX variants with the 11 ACR clinical criteria for SLE in 521 Swedish cases.

| Phenotypes           | C8orf13/BLK: rs13277113 |                                       | ITGAM/ITGAX: rs11574637 |                          |
|----------------------|-------------------------|---------------------------------------|-------------------------|--------------------------|
|                      | P*                      | Odds Ratio <sup>^</sup><br>(95% c.i.) | P                       | Odds Ratio<br>(95% c.i.) |
| Immunologic disorder | 0.740                   | 0.94 (0.66-1.34)                      | 0.626                   | 0.91 (0.64-1.31)         |
| Anti-nuclear autoAbs | 0.609                   | 0.90 (0.60-1.35)                      | 0.254                   | 1.28 (0.84-1.94)         |
| Renal disorder       | 0.098                   | 0.73 (0.50-1.06)                      | 0.460                   | 0.87 (0.59-1.27)         |
| Arthritis            | 0.378                   | 0.88 (0.59-1.32)                      | 0.938                   | 1.02 (0.68-1.53)         |
| Hematologic disorder | 0.460                   | 0.86 (0.57-1.29)                      | 0.532                   | 1.14 (0.75-1.74)         |
| Malar rash           | 0.313                   | 1.20 (0.84-1.70)                      | 0.616                   | 0.91 (0.64-1.31)         |
| Serositis            | 0.056                   | 1.45 (0.99-2.13)                      | 0.073                   | 1.43 (0.97-2.10)         |
| Photosensitivity     | 0.975                   | 1.01 (0.57-1.80)                      | 0.363                   | 1.31 (0.73-2.34)         |
| Neurologic disorder  | 0.269                   | 1.22 (0.86-1.74)                      | 0.068                   | 1.41 (0.97-2.03)         |
| Discoid rash         | 0.526                   | 0.89 (0.62-1.27)                      | 0.053                   | 1.44 (0.99-2.09)         |
| Oral ulcers          | 0.500                   | 0.71 (0.27-1.91)                      | 0.318                   | 1.70 (0.59-4.91)         |

\* P value for association of the indicated SNP to the 11 ACR clinical criteria

<sup>^</sup> Odds ratio and 95% confidence interval for each phenotype.

## SUPPLEMENTARY FIGURES

Supplementary Figure 1. Formula used to combine corrected Z scores weighted for series size and adjusted for residual genomic control inflation factor ( $\lambda_{gc}$ ). The variance ( $\sigma^2$ ) of each series was calculated where  $p$  = the allele frequency in cases and controls. The combined Z score for the 3 SLE series ( $Z^*$ ) was calculated where  $Z_1$ ,  $Z_2$ , and  $Z_3$  equals the Z score based on the EIGENSTRAT corrected chi square for the association of a variant to SLE from each series, and where  $\lambda_1$ ,  $\lambda_2$ , and  $\lambda_3$  is the residual genomic control inflation factor ( $\lambda_{gc}$ ) after EIGENSTRAT correction for each series.

$$Z^* = \frac{\sqrt{\frac{\sigma_{Z1}^2}{\lambda_1}}}{\sqrt{\frac{\sigma_{Z1}^2}{\lambda_1} + \frac{\sigma_{Z2}^2}{\lambda_2} + \frac{\sigma_{Z3}^2}{\lambda_3}}} Z_1 + \frac{\sqrt{\frac{\sigma_{Z2}^2}{\lambda_2}}}{\sqrt{\frac{\sigma_{Z1}^2}{\lambda_1} + \frac{\sigma_{Z2}^2}{\lambda_2} + \frac{\sigma_{Z3}^2}{\lambda_3}}} Z_2 + \frac{\sqrt{\frac{\sigma_{Z3}^2}{\lambda_3}}}{\sqrt{\frac{\sigma_{Z1}^2}{\lambda_1} + \frac{\sigma_{Z2}^2}{\lambda_2} + \frac{\sigma_{Z3}^2}{\lambda_3}}} Z_3$$

$$\sigma_Z^2 = \left( \frac{1}{n_{cases}} + \frac{1}{n_{controls}} \right) * p(1-p)$$
